# Supplementary material for: The Ink4a/Arf locus operates as a regulator of the circadian clock modulating RAS activity
Source: PubMed Central journal article supplement (PMC5720494; doi:10.1371/journal.pbio.2002940), 2017-12-07

**Figure S1. Effects of *shBmal1* and RAS inhibition/induction in MEF cells.**

**A**

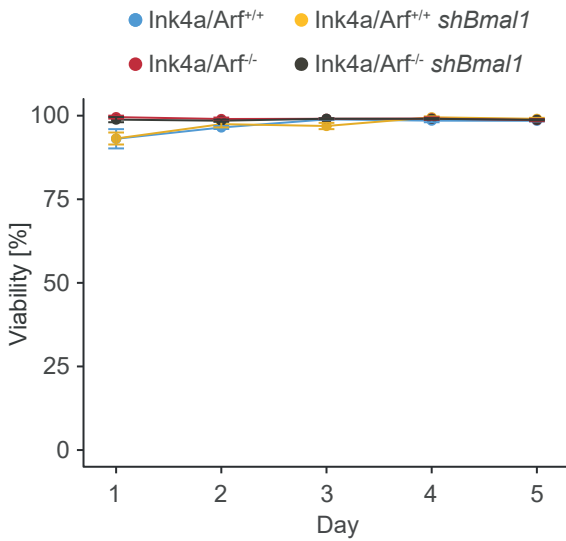

**B**

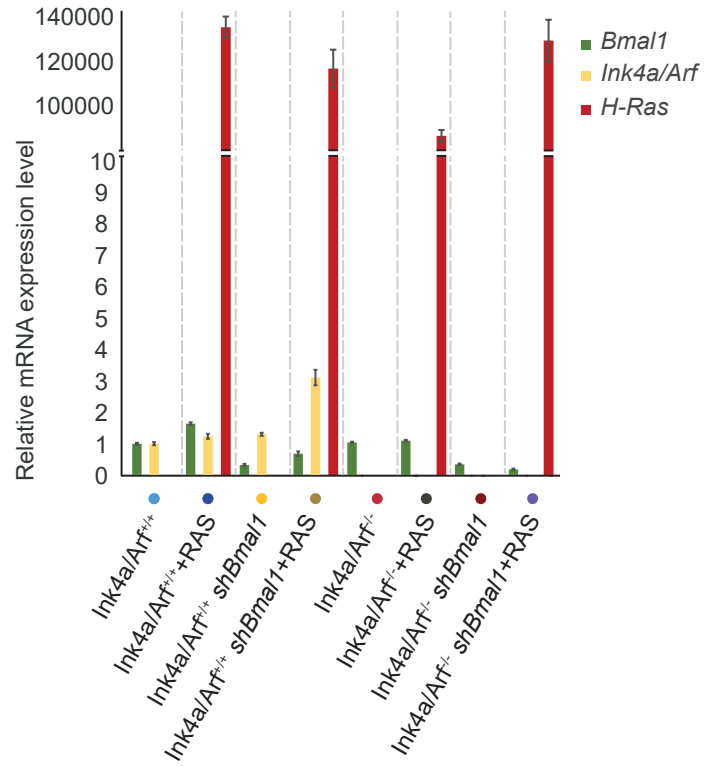

**C**

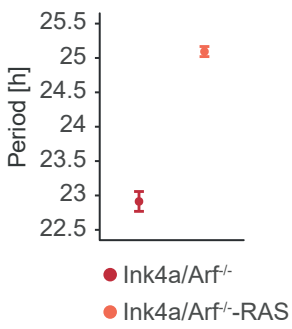

**D**

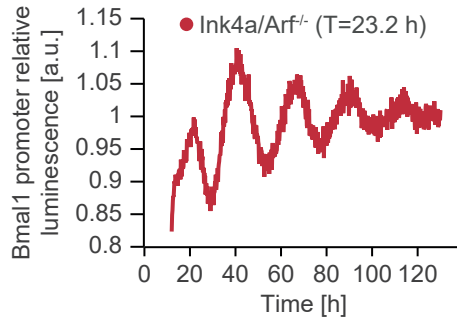

**E**

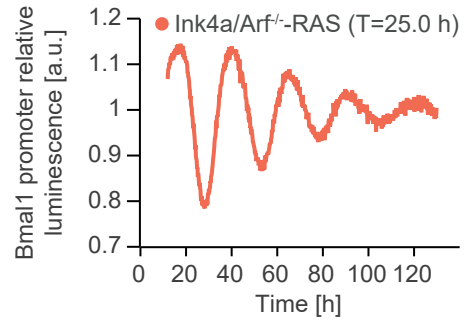

**F**

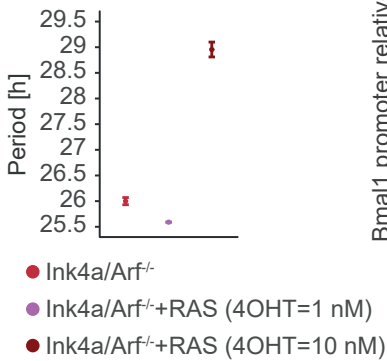

**G**

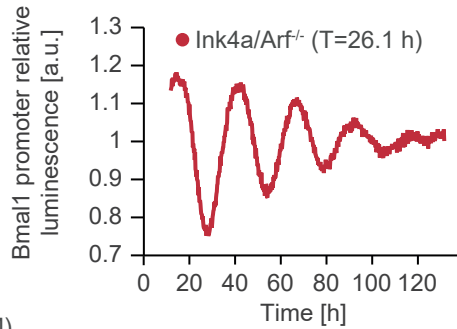

**H**

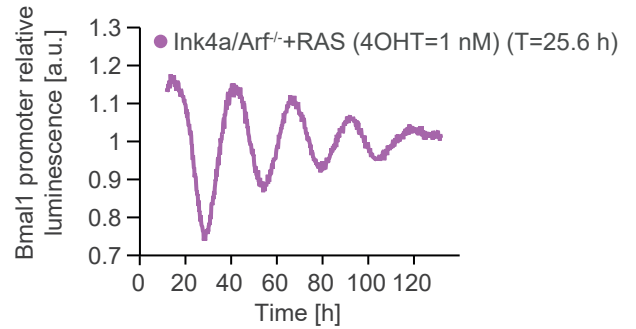

**I**

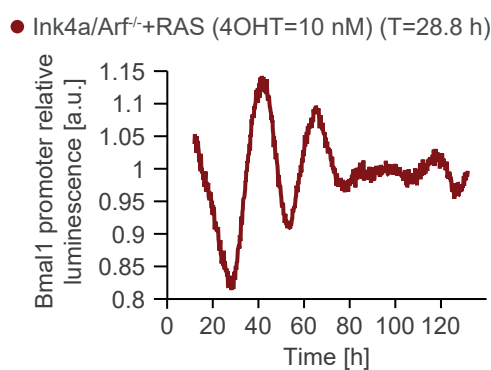

**J**

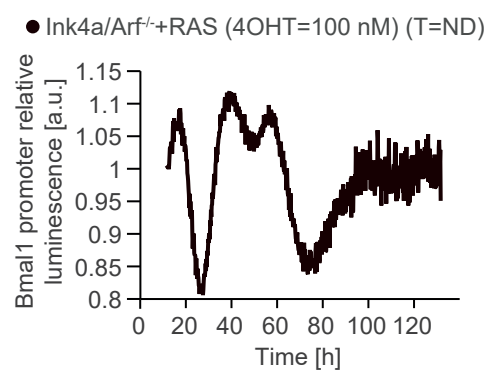

Supplement: pbio.2002940.s001.pdf [file pbio.2002940.s001.pdf]
