# Supplementary material for: The Ink4a/Arf locus operates as a regulator of the circadian clock modulating RAS activity
Source: PubMed Central journal article supplement (PMC5720494; doi:10.1371/journal.pbio.2002940), 2017-12-07

Figure S2. Detailed diagram of the mathematical model.

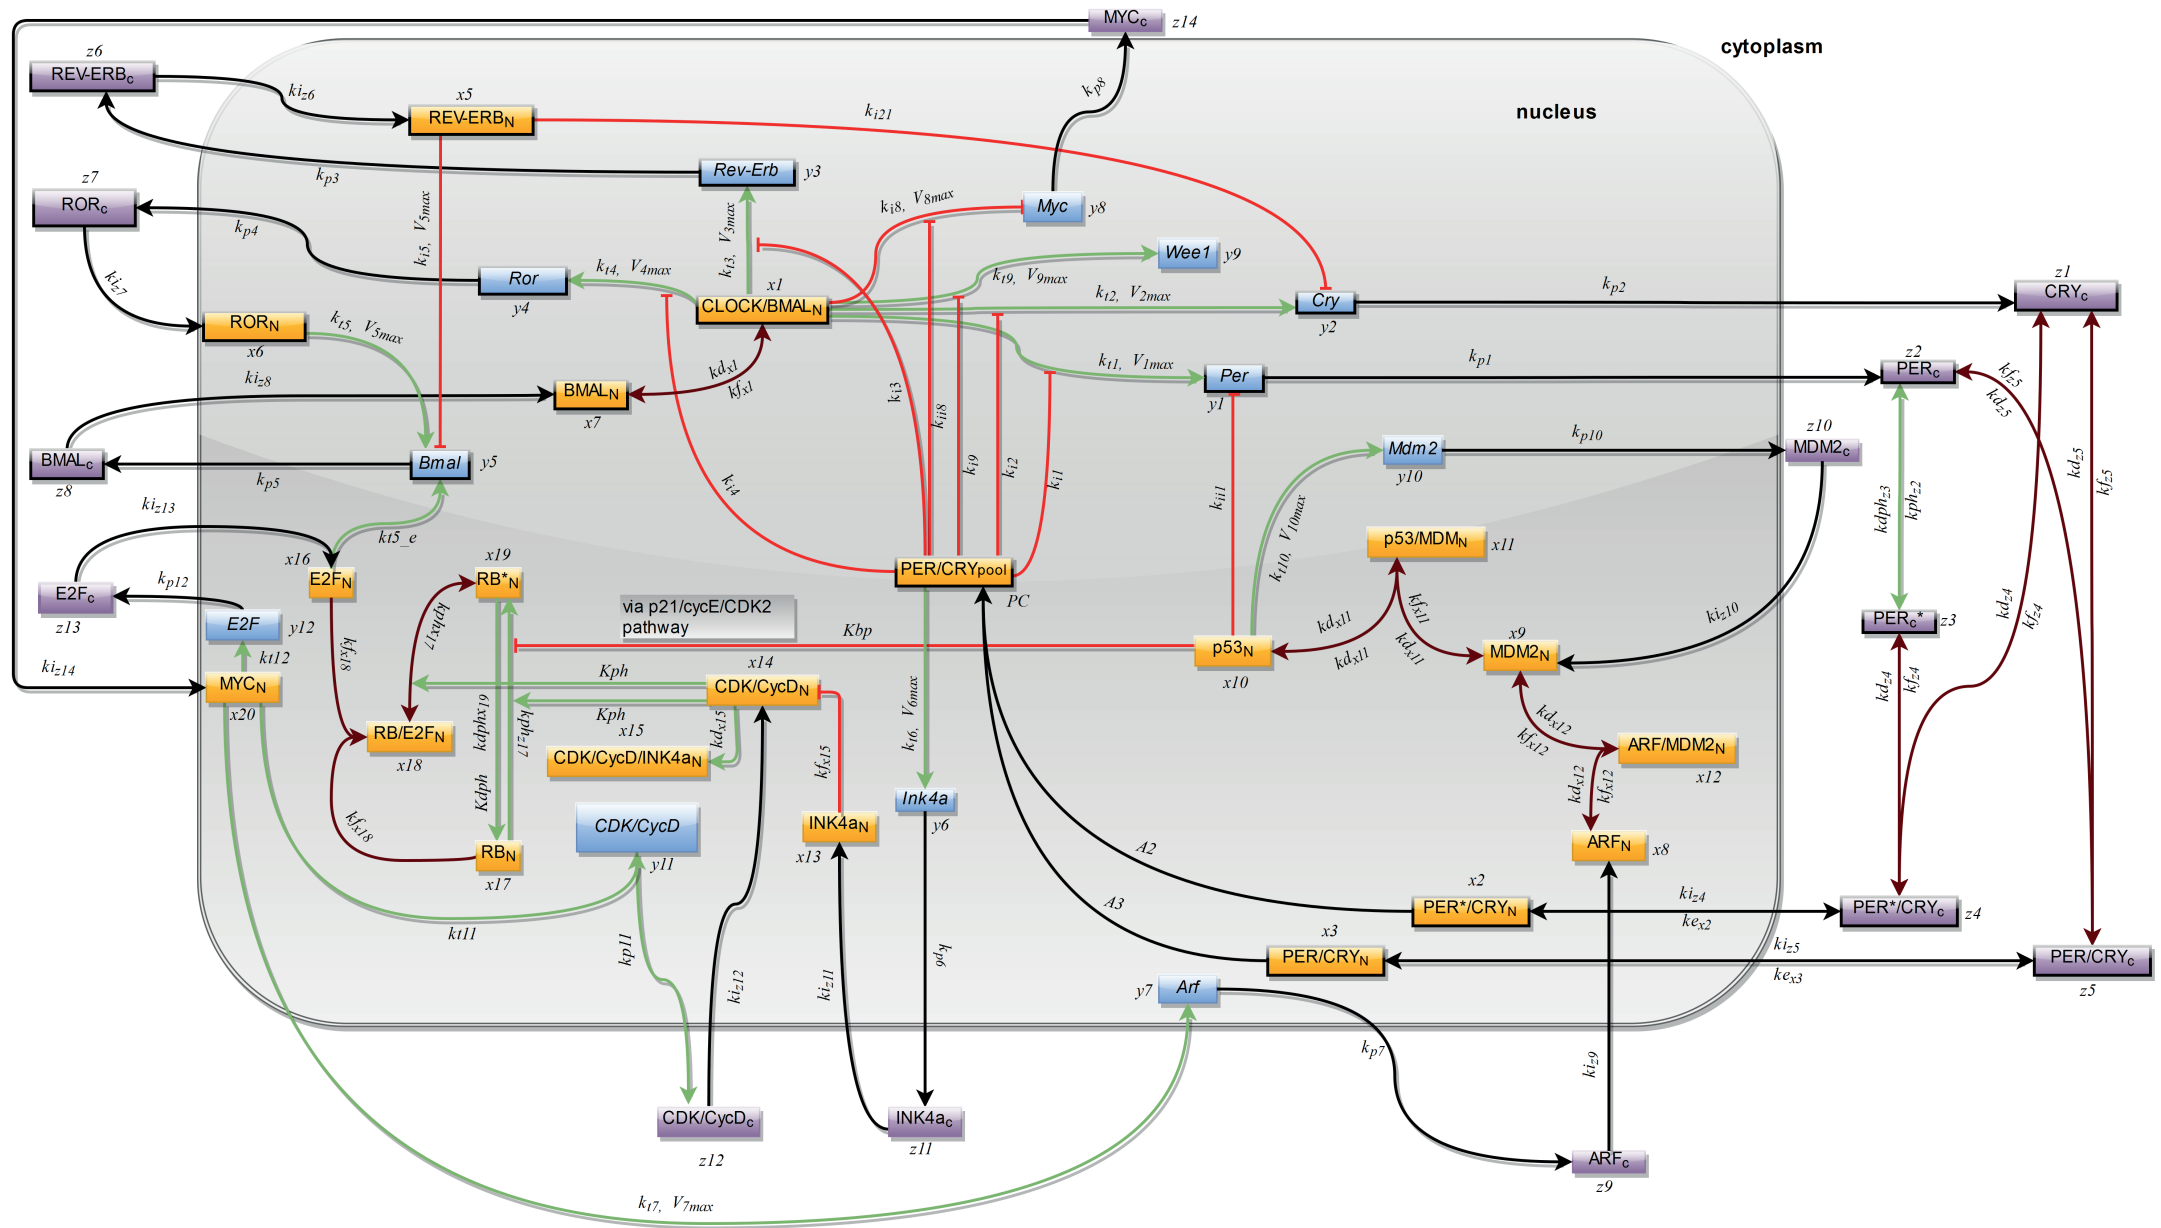

Supplement: pbio.2002940.s002.pdf [file pbio.2002940.s002.pdf]
