# Supplementary material for: The Ink4a/Arf locus operates as a regulator of the circadian clock modulating RAS activity
Source: PubMed Central journal article supplement (PMC5720494; doi:10.1371/journal.pbio.2002940), 2017-12-07

Figure S3. *In silico* period clock phenotype variation in an Ink4a/Arf-RAS- dependent manner.

A

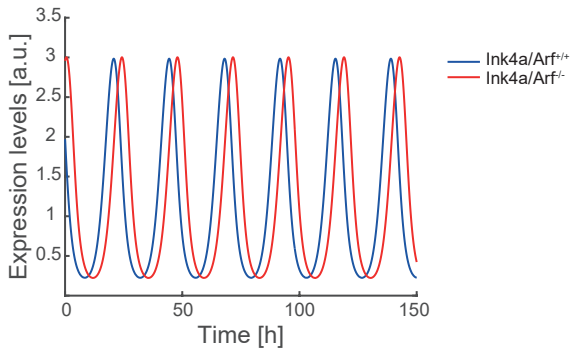

B

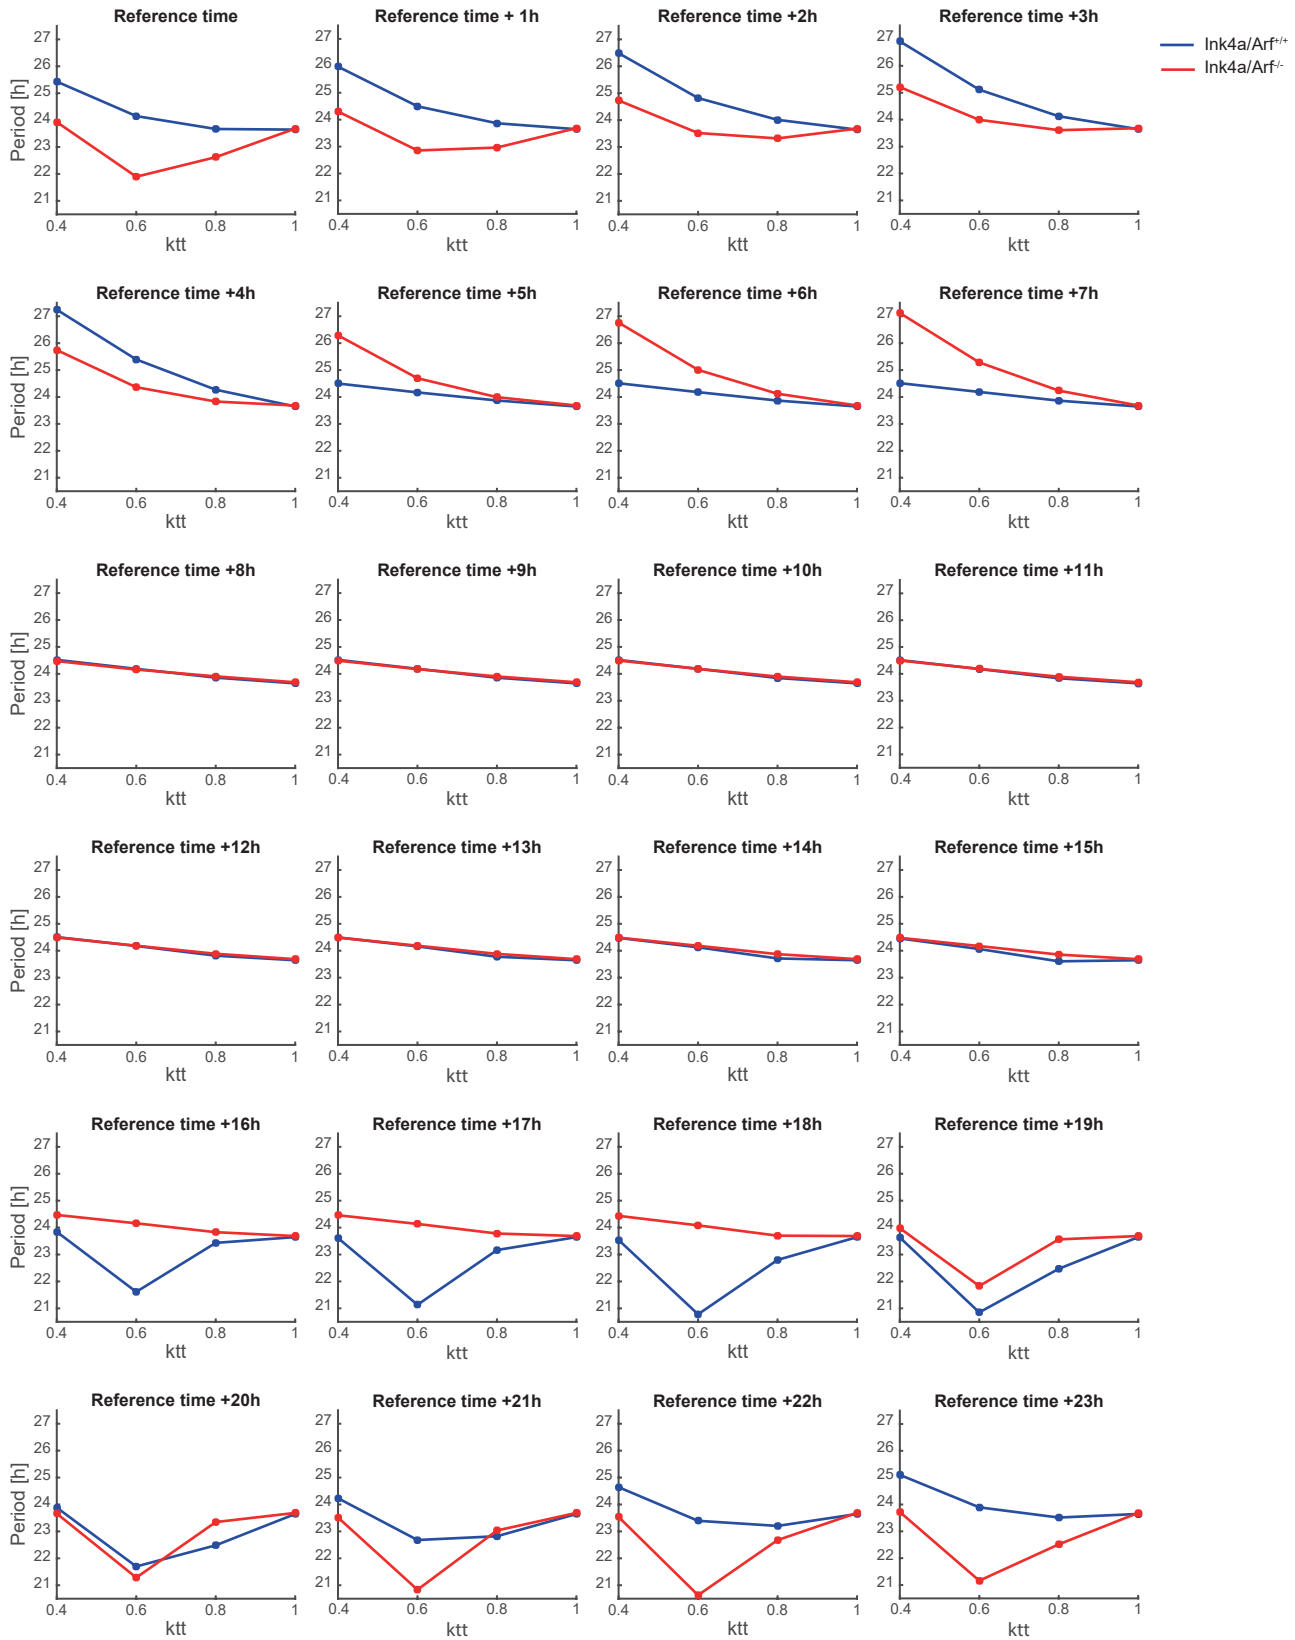

Supplement: pbio.2002940.s003.pdf [file pbio.2002940.s003.pdf]
