# Supplementary material for: The Ink4a/Arf locus operates as a regulator of the circadian clock modulating RAS activity
Source: PubMed Central journal article supplement (PMC5720494; doi:10.1371/journal.pbio.2002940), 2017-12-07

Figure S4. Network of differentially expressed genes and clock-related genes.

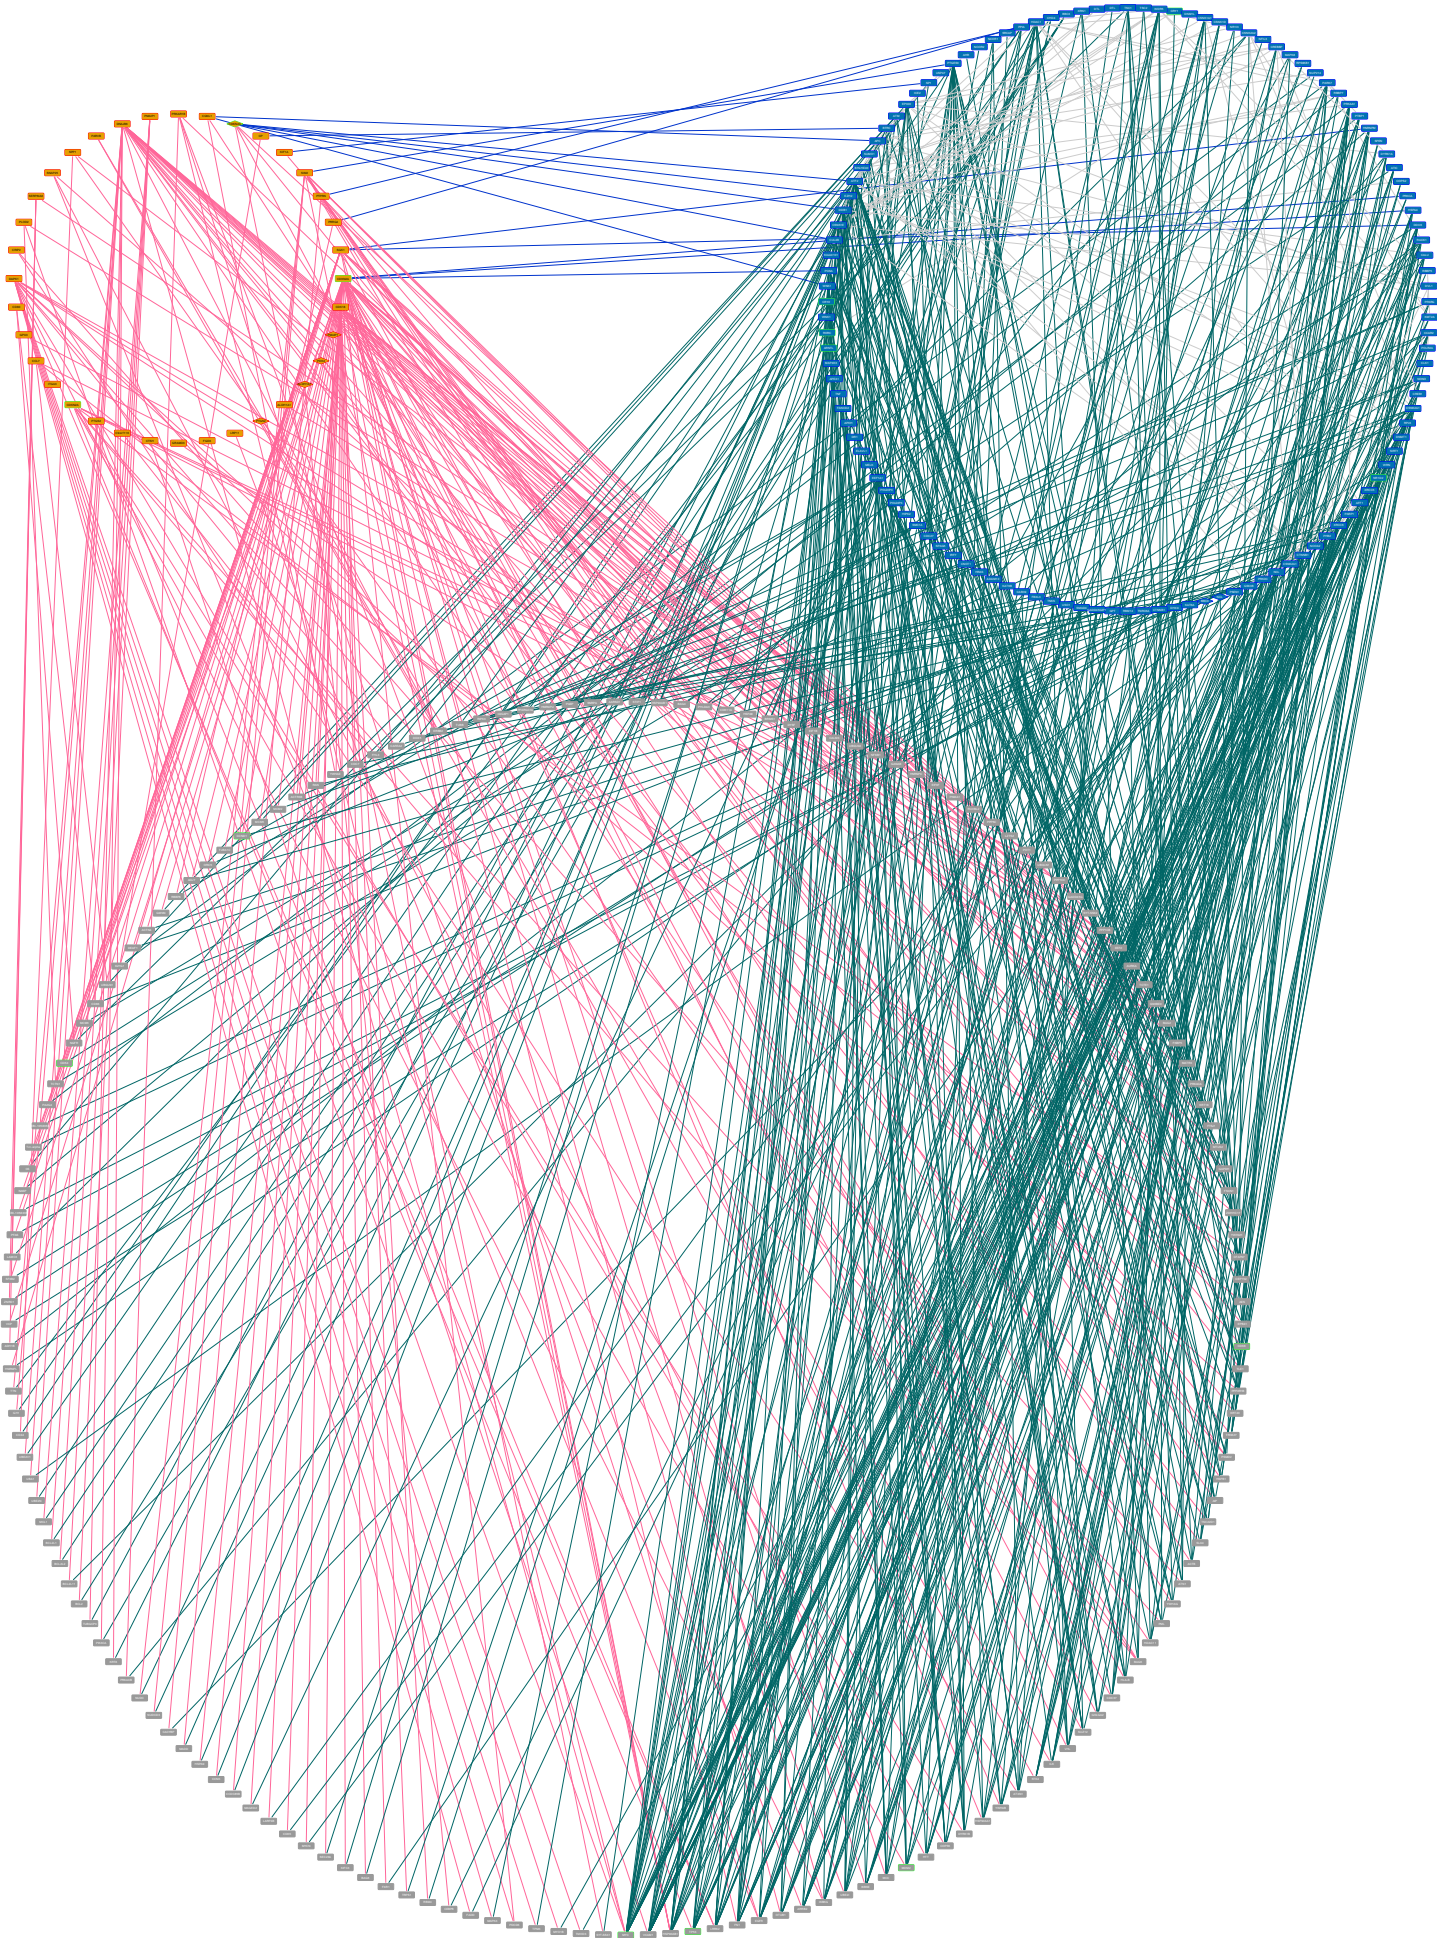

Supplement: pbio.2002940.s004.pdf [file pbio.2002940.s004.pdf]
