# Supplementary material for: The Ink4a/Arf locus operates as a regulator of the circadian clock modulating RAS activity
Source: PubMed Central journal article supplement (PMC5720494; doi:10.1371/journal.pbio.2002940), 2017-12-07

## Supporting Information S4 Text – Gating strategies for the FACS analysis

The cells of interest were gated based on forward scatter/side scatter (FSC vs. SSC) values. The cell cycle analysis was conducted by fitting a univariate cell cycle model to the previously gated population using the Watson pragmatic algorithm as implemented in FlowJo v10.2 (FlowJo LLC).

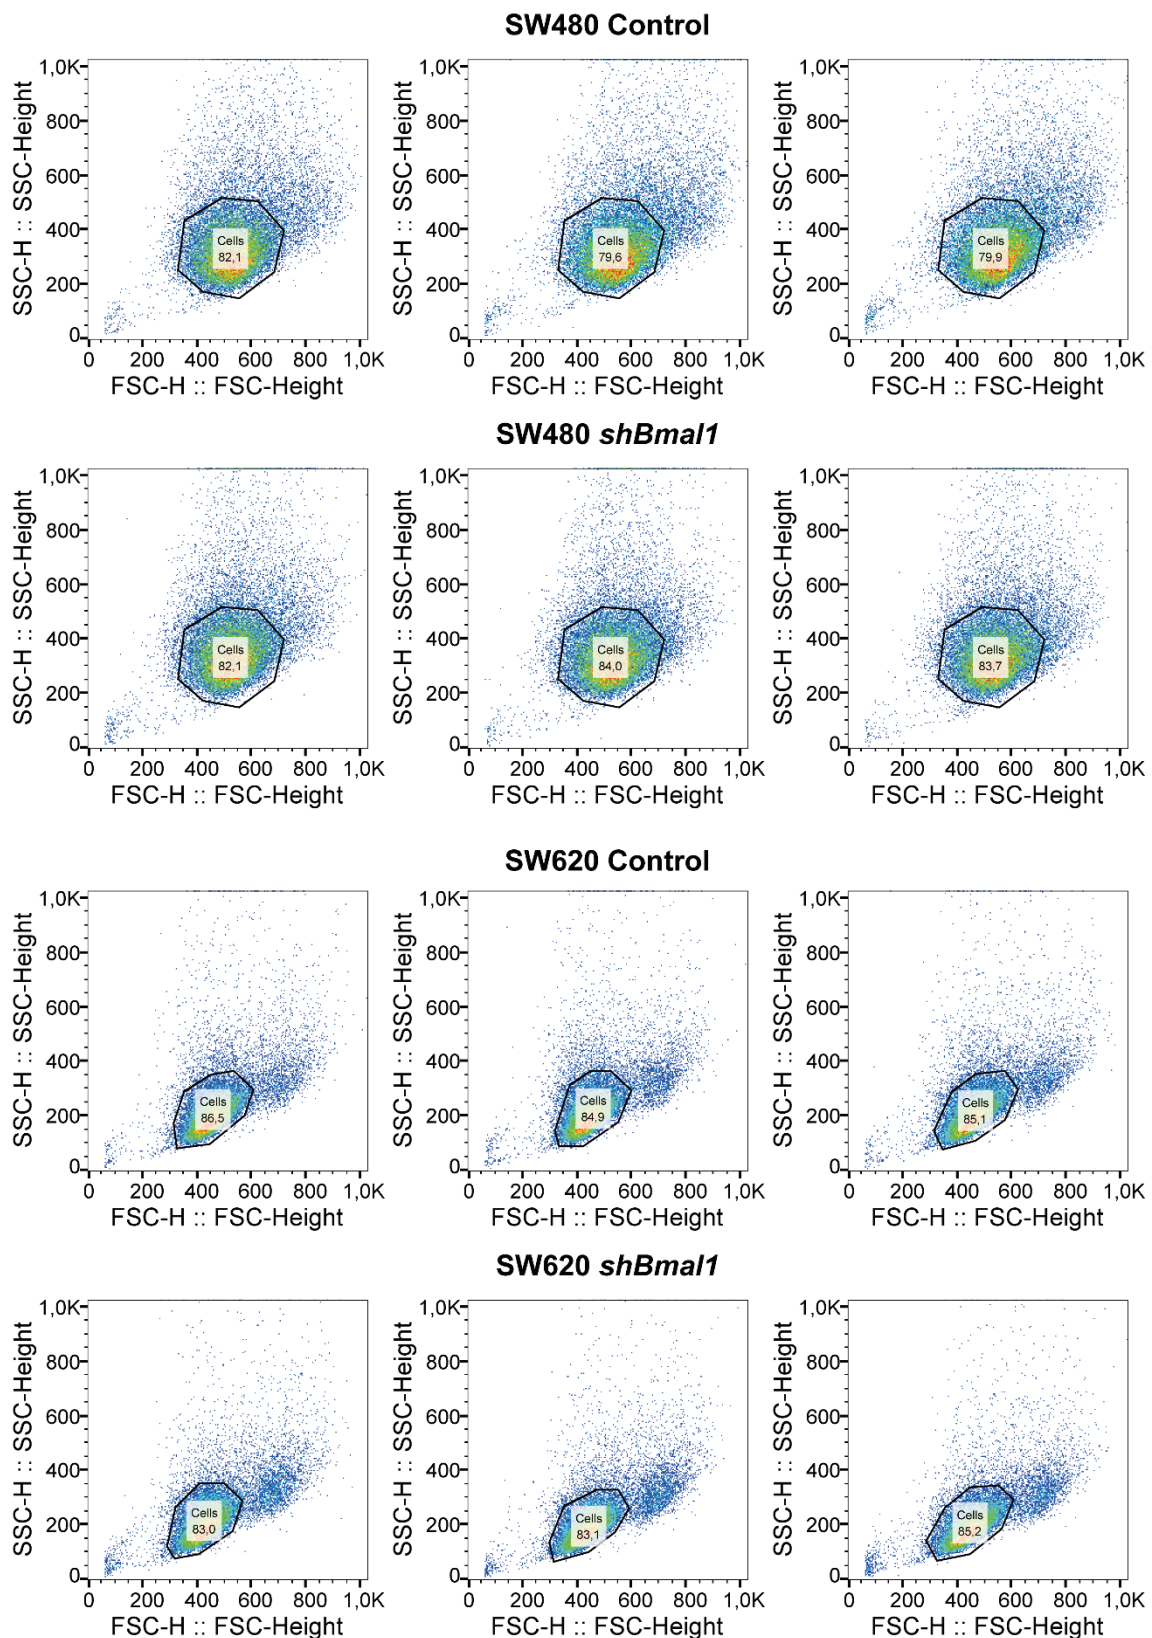

**Ink4a/Arf<sup>+/+</sup> MEFs**

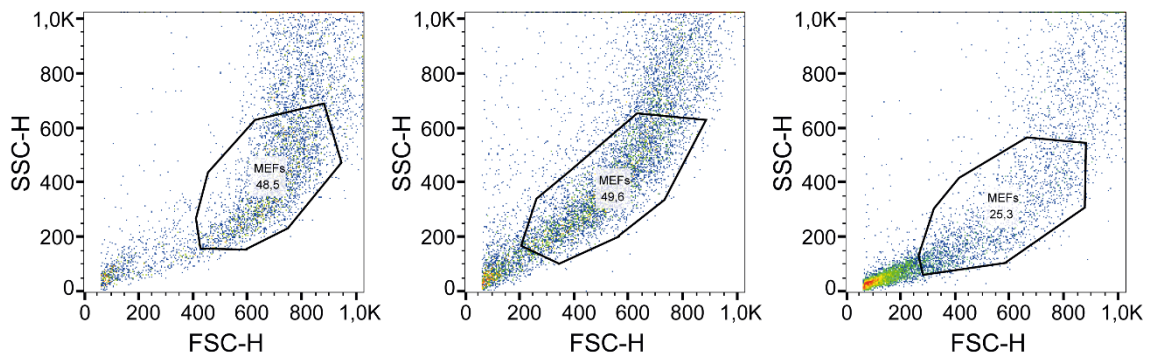

**Ink4a/Arf<sup>+/+</sup>+RAS MEFs**

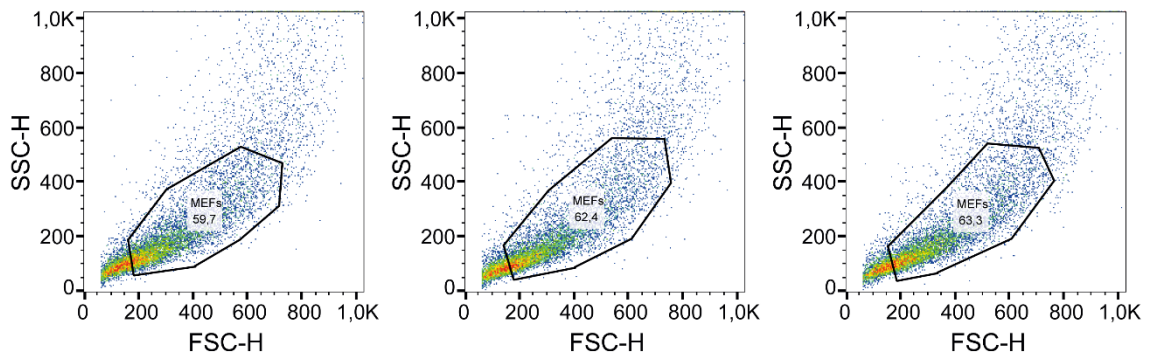

**Ink4a/Arf<sup>-/-</sup> MEFs**

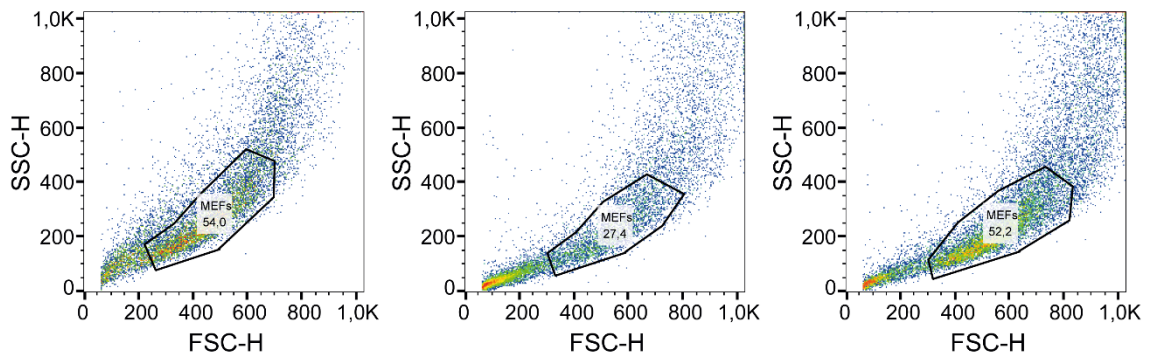

**Ink4a/Arf<sup>-/-</sup>+RAS MEFs**

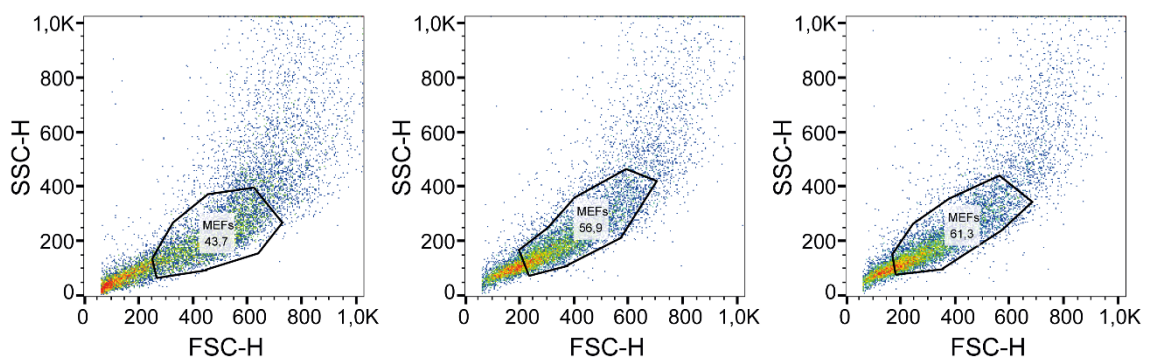

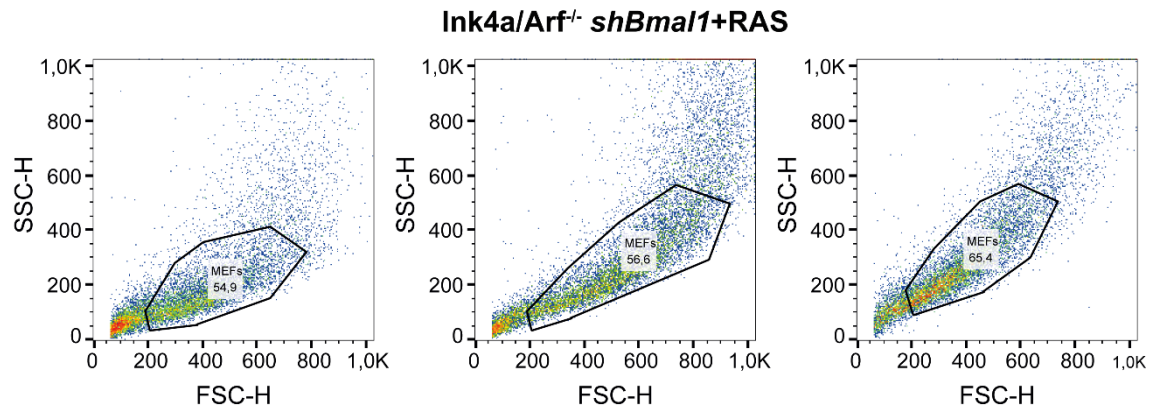

Supplement: pbio.2002940.s012.pdf [file pbio.2002940.s012.pdf]
